# Cascading indirect genetic effects in a clonal vertebrate

Amber M. Makowicz<sup>\*1</sup>, David Bierbach<sup>2,3,4</sup>, Christian Richardson<sup>1</sup>, Kimberly A. Hughes<sup>1</sup>

<sup>1</sup>*Department of Biological Sciences, Florida State University, 319 Stadium Drive, Tallahassee, FL 32304*

<sup>2</sup>*Department of Biology and Ecology of Fishes, Leibniz Institute of Freshwater Ecology and Inland Fisheries, Müggelseedamm  
310, 12587 Berlin, Germany*

<sup>3</sup>*Excellence Cluster 'Science of Intelligence,' Technische Universität Berlin, Berlin, Germany*

<sup>4</sup>*Faculty of Life Sciences, Thae-Institute, Humboldt-Universität zu Berlin, Berlin, Germany*

*\*Corresponding author's email: amakowicz@fsu.edu*

**Short title:** Cascading IGE in Amazon mollies

*Keywords:* cascading IGE, exploratory behaviors, gene x environment interactions, gynogens, *Poecilia formosa*, stress behaviors

## **Author contributions**

This study was conceived by AMM and KAH, data collected by AMM and CR, analyzed the data by KAH, AMM and DB, and the manuscript was written by AMM and KAH.

## **Data archiving**

All data will be archived in Figshare upon acceptance.

## **Abstract**

Understanding how individual differences among organisms arise and how their effects propagate through social groups are fundamental questions in behavioral biology. Genetic variation among social partners can influence individual phenotypes, creating individual differences that might then have cascading effects in social groups. Using a clonal species, the

28 Amazon molly (*Poecilia formosa*), we test the hypothesis that such indirect genetic effects (IGE)  
29 propagate beyond individuals that experience them firsthand. We tested this hypothesis by  
30 exposing genetically identical Amazon mollies to social partners of different genotypes, and  
31 then moving these individuals to new social groups in which they were the only member to  
32 have experienced the IGE. We found that the differences in aggression experienced in  
33 genetically different social environments carried over into new social groups to influence the  
34 exploratory behaviors of individuals that did not directly experience the previous social  
35 environments. Our data reveal that IGE can propagate beyond the individuals that directly  
36 experience them in Amazon mollies and possibly in many group-living species. Theoretical and  
37 empirical expansion of the quantitative genetic framework developed for IGE to include  
38 cascading and other types of carry-over effects will facilitate understanding of among-  
39 individual variation, social behavior and its evolution.

40

## 41 **1. Introduction**

42 Interactions among individuals define the social environment and individual differences  
43 have long been known to influence these interactions [1, 2]. Understanding how individual  
44 differences arise and how their effects propagate through social groups are fundamental  
45 questions in behavioral biology. One cause of both individual variation and propagation of  
46 effects in social groups are indirect genetic effects (IGE) [3-5]. IGE arise when an individual's  
47 phenotype is influenced by the genotype of its social partners, and they have been documented  
48 to affect behavioral, life history, and morphological traits in a wide variety of taxa [e.g., 6-16].  
49 Most of the IGE literature focuses on how stimulus genotypes influence the phenotype of focal  
50 individuals. While understanding these dyadic interactions is important, much less is known  
51 about IGE on group-level characteristics or the degree to which IGE can propagate to affect  
52 phenotypes of individuals that do not experience them firsthand. Because IGE can profoundly  
53 affect phenotypes, fitness, and the rate and direction of evolutionary change [17-19],

54 understanding possible cascading or carry-over effects within social groups is necessary to  
55 understand behavioral variation and evolution.

56         There have been two studies, to our knowledge, that have investigated IGE beyond  
57 those caused by dyadic interactions. The first used fruit flies (*Drosophila melanogaster*), to  
58 measure first-order IGE on male aggressive behavior (i.e., how the genotype of stimulus  
59 individuals influences the phenotypes of individuals with which they interact) and second-  
60 order IGE (i.e., effects of the stimulus genotypes on the interaction between two other members  
61 of the group) [20]. This experiment showed that the stimulus genotypes differed in their first-  
62 order effects on individuals, and on second-order effects on interactions between other group  
63 members. The second study, also using *D. melanogaster*, reported that the genotype of stimulus  
64 individuals influenced emergent, group-level behavior of focal individuals [21]. Specifically,  
65 these investigators reported that, if individuals of the stimulus genotype were more cohesive  
66 (i.e., closer to one another, on average), then the focal individuals were also more cohesive, and  
67 interactions between stimulus and focal individuals were less frequent.

68         Together, these two experiments indicate that IGE can extend beyond the direct effects  
69 of one individual on another. However, it remains unknown whether IGE previously  
70 experienced by one or a few group members can influence the behavior of individuals that were  
71 never exposed to the IGE. That is, can IGE propagate beyond individuals that experience them  
72 firsthand? Previous work indicates that individual group members can influence group  
73 behavior [1, 22-26]. However, this literature has generally not focused on prior social experience  
74 as a factor that generates differences between influential group members [but see 27, 28], and  
75 we know of no studies that implicate IGE as a cause of such differences. Because many  
76 organisms exhibit either dispersal or fission-fusion social structure, understanding IGE caused  
77 by prior social environments is critical to understanding the evolution and ecology of collective  
78 behaviors. Furthermore, it is challenging to measure prior influence of IGE because it is difficult  
79 to replicate group genotypic composition and genetically-based differences in social experience  
80 in sexually-reproducing species.

81 Naturally clonally-reproducing organisms provide an opportunity to measure these  
82 effects outside of model species and without inbreeding or complex breeding designs. The  
83 Amazon molly (*Poecilia formosa*) is a gynogenetic, all-female species [29] that arose from a single  
84 hybridization event between a male sailfin molly (*Poecilia latipinna*) and a female Atlantic molly  
85 (*Poecilia mexicana*) about 100,000 generations ago [30, 31]. Although reproduction is clonal,  
86 females require sperm from a male of one of the ancestral species (sailfin or Atlantic molly) to  
87 initiate embryogenesis of unreduced ova [32]. Many distinct clonal lineages arose from the  
88 original diploid lineage through mutation or complete and/or partial incorporation of paternal  
89 genetic material (i.e., through triploidy or acquisition of microchromosomal-sub fragments of  
90 paternal chromosomes), which can be stable and transmitted to subsequent generations [32, 33].  
91 Furthermore, new evidence shows high inter-clonal transcriptional variation which suggests  
92 that different clonal lineages can adapt to different environments through long-term selection  
93 on transcriptional fitness [34]. Together, this genetic diversity within a gynogenetic species  
94 produces opportunities in which social interactions occur on multiple levels: within-clone  
95 interactions, among-clone interactions, and interspecies interactions between Amazons and  
96 their sexual hosts. While the interactions between Amazon mollies and their hosts has been the  
97 focus of many investigations over the past forty years [e.g., 27, 335-38], little attention has  
98 focused on the social interactions within and among the different clonal lineages. Nonetheless,  
99 previous research suggests that clonal lineages vary in the social behaviors [39] and this  
100 variation may be via functional differences in transcription landscapes [34].

101 In natural populations, the number of clonal lineages that co-occur can vary  
102 dramatically from a single lineage to more than a dozen [40-42]. Therefore, the degree of  
103 competition and the frequency with which females encounter conspecifics of different lineages  
104 can vary greatly across time and space. One of the first studies to investigate social behaviors  
105 among different clones reported that females could distinguish between lineages, associate  
106 preferentially with fish of their own lineage, and were more aggressive toward unrelated clones  
107 [39]. Other studies have reported that different features of the social environment can influence

108 social behavior, especially aggression, within and among clonal lineages, including early  
109 dominance interactions [43] and the degree of familiarity among individuals [44, 45]. These data  
110 suggest that individual behavior depends in part on the clonal composition of the social  
111 environment; that is, IGE are likely to be important regulators of phenotypic variation and  
112 social dynamics in natural populations.

113 We leveraged clonal variation in Amazon mollies to test the hypothesis that IGE  
114 propagate beyond individuals that experience them firsthand. This hypothesis predicts that  
115 variation in behavior generated by IGE in a previous social environment will influence the  
116 behavior of naïve individuals when an animal with this prior experience joins their group. To  
117 distinguish this effect from first- and second-order IGE, we use the term 'cascading IGE'. Based  
118 on extensive literature indicating that individual differences in behavior affects group-emergent  
119 phenotypes [reviewed by 1, 2], we also predicted that cascading IGE would influence group-  
120 emergent behavior in these fish. We tested these predictions by exposing genetically identical  
121 Amazon mollies to social partners of different genotypes, and then moving these individuals to  
122 new social groups in which they were the only member to have experienced IGE.

123

## 124 **2. Material and methods**

### 125 *(a) Study Specimens*

126 Three distinct clonal lineages were used in this study, but all lineages were descended  
127 from individuals collected from the Río Purificación in Nuevo Padilla, Mexico (24°4'42.85"N,  
128 99°7'21.76"W) originated from single-lineage stock populations kept in a greenhouse at the  
129 Mission Road Research Facility of Florida State University. Both Clone 1 (VI/17 Schartl) and  
130 Clone 2 (VI/17 AMM#11) are diploid with microchromosomes, although the  
131 microchromosomes are distinctly different between the two lineages [39, 46]. The focal clone  
132 (VI/17 3N) is a triploid without any microchromosomes.

133 Two weeks prior to initiating the experiment, we marked all fish with elastomer tags  
134 (two 3mm subcutaneous marks anterior and/or posterior of the dorsal fin) to allow us to

135 identify focal individuals within each long-term social environment tank. To recover, fish were  
136 placed in 113.6L aquaria treated with Stress Coat+® (API®) and sea salt (Instant Ocean®), with  
137 each aquarium containing an average of ten sister clone individuals. Females were all virgins  
138 and, thus, were all receptive but not pregnant at the time of the trials. They were fed daily ad  
139 libitum with commercial fish food (Tetramin® tropical flakes). Experiments occurred from  
140 August to November 2019, and fish were exposed to natural light cycles during the course of  
141 the experiment.

142

143 *(b) Long-term social environments*

144 Focal females were placed into 18.9L aquaria in one of three different long-term social  
145 environments: (1) 1 focal female + 2 sister clones; (2) 1 focal female + 2 females from a Clone 1;  
146 and (3) 1 focal female + 2 females from Clone 2. That is, each aquarium contained 1 focal fish  
147 and 2 "social partner" fish. The partner fish genotypes, but not the genotype of focal fish,  
148 differed among treatments. All aquaria contained sand and two small PVC pipe fittings (2 cm)  
149 for shelter, with one long side and two short sides covered with blue tarp to prevent visual  
150 communication with neighboring tanks. Each social-environment treatment was replicated 12  
151 times for a total of 36 experimental tanks. Experimental tanks were set up using a randomized  
152 complete block design (one replicate of each treatment per block) over the course of two weeks  
153 until all 12 blocks were complete. All females ranged between 27 and 38 mm in standard body  
154 length with a maximum size difference among females within each social environment of 4 mm.

155 To characterize differences in the social environment induced by the three different  
156 social treatments, we measured social interactions in the experimental tanks at 9 different times  
157 over the course of the experiment: 10 min after placing the focal fish in the social environment  
158 (week 0), weekly for the first four weeks thereafter (weeks 1-4), and then biweekly until a total  
159 of 12 weeks of exposure (weeks 6, 8, 10, and 12). Behavior measured at week 0 represents a  
160 baseline because females had no prior exposure to social treatments at this time point. Social  
161 behavior in the experimental tanks consisted mainly of aggressive interactions (bites, tail beats,

162 and chasing); few affiliative or neutral behaviors (e.g., swimming in the same direction or  
163 foraging simultaneously within 2 body lengths) were observed outside an aggressive context  
164 (e.g., proceeding or following biting, chasing or tail beating). We counted the number of bites  
165 and tail beats performed, and the total time (s) spent performing these behaviors and chasing  
166 other females. Tail beats were rarer than bites, and the distribution was zero-inflated. We,  
167 therefore, summed the total number bites and tail beats observed, and separately summed the  
168 total time spent in aggressive interactions to produce two overall measures of aggression: total  
169 number of aggressive acts and total time spent in aggression. Both measures were log-  
170 transformed before analysis, after adding 1 to account for zero values. We excluded one datum  
171 (block 7, clone 1 treatment, week 3) due to it being an extreme outlier: 174 aggressive acts (2.3x  
172 higher than the maximum number of acts in any other tank), and 190s of total aggression (2.2x  
173 larger than the maximum time spent being aggressive in any other tank). Individual  
174 identification was not possible during the trial while fish were in motion and visible only from  
175 one side. Therefore, we used the total number and duration of these behaviors across all fish in  
176 the trial to characterize the social environment within the tank. These assays were recorded by a  
177 live observer blind to the treatments for a duration of 10 minutes.

178

### 179 *(c) Naïve-group tests*

180 Each focal female was introduced to a pair of novel ('naïve') social partners three times  
181 over the course of the experiment (at 0, 4, and 12 weeks). A different pair of naïve social  
182 partners was used at each of these trials, and those partner fish were not used with any other  
183 focal female. We measured the average behavior of these naïve-groups before exposing focal  
184 fish to genetically different long-term social environments (week 0) and after 4- and 12-weeks of  
185 exposure (see figure 1). To do so, individual focal females were removed from their rearing tank  
186 (at week 0) or their long-term social environment tank (at weeks 4 and 12) and placed in a  
187 "naïve-group" test chamber with two unfamiliar females from the same clonal lineage as the  
188 focal fish, size matched to the focal fish ( $\pm 4\text{mm}$ ), and in the same reproductive state. These



189 novel fish were drawn from monoclonal, non-breeding rearing tanks similar to those from  
190 which focal and stimulus females originated and were, therefore, not exposed to the  
191 experimental social environments experienced by the focal females. After we introduced the  
192 focal fish into the naïve-group test chamber, we video recorded all three fish for 10 minutes,  
193 after which the focal female was removed and placed back into her experimental social  
194 environment (figure 1).

195         The naïve-group test chamber was an open field, circular tank (55.9 cm diameter), with  
196 half the bottom and corresponding sides painted white and the other half grey. This test  
197 chamber was placed inside a frame covered with blue tarp to minimize external disturbance. All  
198 water in the chamber was replaced with clean freshwater prior to every test. In the center of the  
199 frame, a camera (JVC Everio 1920x1080 HD video camcorder) was suspended 1.1 m above the  
200 tank. All videos were edited to remove the first and last 2 minutes of recording (VideoPad  
201 Video Editor by NCH software©, v. 8.40) to allow for acclimation to the experimental tank and  
202 to remove any influence of camera or experimenter movement at the beginning and end of trial.  
203 All cropped videos were 6 minutes long and were analyzed by a blind observer using  
204 EthoVision XT (Noldus, v14). Within the EthoVision program, we distinguished the three  
205 individuals throughout the analyses and acquired movement and position data (Cartesian  
206 coordinates) for all three individuals. Although fish could be individually tracked, the focal  
207 individual could not be distinguished from the novel partner fish on the videos; therefore, we  
208 did not calculate separate metrics for focal and novel partner fish. We extracted the following  
209 measures from EthoVision: distance traveled (cm), velocity (cm/s<sup>2</sup>), frequency entering white  
210 zone, duration in white zone (s), latency to enter white zone (s), frequency entering grey zone,  
211 duration in grey zone (s), time spent immobile (s; freezing behavior), and distance between  
212 individuals (cm; shoaling distance).

213         We interpret these behaviors to reflect stress-related behavior and tendency to be  
214 exploratory. More stressed individuals are less active, travel shorter distances at lower velocity,  
215 spend more time frozen and in the grey zone (negative phototaxis), and are closer together; less



216 stressed individuals tend to be more exploratory and cover more distance, move at higher  
217 velocity, enter zones more frequently, spend more time in the white zone and less time frozen,  
218 and have more distance between individuals [47, 48]. We also gathered baseline data on these  
219 behaviors by following the same procedure at the start of the experiment, before the focal fish  
220 had experienced the experimental social treatments (time 0; figure 1: Pre-exposure).

221

#### 222 *(d) Ethics*

223 All fish tanks included substrate and enrichment and were maintained with weekly  
224 water changes throughout the duration of this study. Fish never suffered from food deprivation  
225 or injuries during this study. This research was approved by the Institutional Animal Care and  
226 Use Committee of Florida State University (1704 and 201900038).

227

#### 228 *(e) Analyses*

229 There were no significant differences in size (SL) among focal females in different social  
230 treatment groups, nor treatment-associated differences in size among the social partners fish  
231 used in the long-term and naïve-group trials (electronic supplemental material, table S1).  
232 Nevertheless, we included SL of focal and partner fish as covariates in subsequent analyses  
233 because there was a non-significant trend for Clone 1 and Clone 2 social partner fish to differ in  
234 SL (electronic supplemental material, table S2)

235

##### 236 *(e.1) Long-term social environment groups.*

237 We assessed the correlation structure of the two measurements of aggression to  
238 determine if they could be adequately represented by principal components (PC), and then  
239 used the first PC from this analysis as our measure of aggression (see Results). To determine if  
240 aggression was influenced by social treatment group, we used this PC score as the dependent  
241 variable in general linear mixed models that accounted for the repeated measures on each  
242 group. In addition to the social treatment group, initial models included fixed effects of

243 exposure time (weeks), treatment-by-time interaction, the baseline (week 0) measure of  
244 aggression PC1 in each group, focal female standard length (log-transformed), and the average  
245 standard length of the social-partner females (log-transformed). A random within-subjects  
246 effect with group ID as the subject was used to account for repeated measures on groups; initial  
247 models also included a random effect due to experimental block. The fixed effects of baseline  
248 aggression and size of social partners never approached significance in initial models (electronic  
249 supplemental material, table S3A), and the random block effect was consistently near zero and  
250 never significant. These terms were, therefore, not included in the final models. This and other  
251 analyses of general linear mixed models were conducted using SAS *Proc Glimmix* in SAS v. 9.4  
252 (SAS Institute Inc. 2013. SAS/STAT 9.4. SAS Institute Inc., Cary, NC.). Because repeated  
253 observations were not equally spaced in time, we used a covariance structure that allows for  
254 unequally-spaced observations (a 1-dimensional spatial structure, implemented with the  
255 *sp(pow)* option). Within-subject variance estimates were allowed to vary by treatment group, by  
256 using the *group* option. Post hoc comparisons of treatment group means were conducted using  
257 the simulation method of [49], as implemented by using the *adjust=simulate* option.

258

259 (e.2) *Naïve-group tests.*

260 To determine the extent to which the presence of the focal individual influenced  
261 behavior in the naïve-groups, and thus to measure cascading IGE, we calculated two kinds of  
262 metrics: those that described average behavior of the 3 members of the group, and those that  
263 described individual behavior of fish within the group. For both analyses, we included seven of  
264 the movement variables (distance traveled (cm), velocity (cm/s<sup>2</sup>), frequency entering white  
265 zone, duration in white zone (s), latency to enter white zone (s), time spent immobile (s; freezing  
266 behavior), and distance between individuals (cm; shoaling distance)); the frequency entering  
267 and duration in the gray zone was redundant with information for entering and duration in the  
268 white zone, so we used only the data for the white zone in the analyses.

269 Average behavior of naïve-groups. We assessed the correlation structure of the 7 behaviors  
270 to determine if they could be adequately represented by principal components (PC). The six  
271 behaviors that described movement or physical position in the enclosure were all moderately to  
272 highly correlated with one another ( $0.4 < |r| < 1.0$ ), but they were not correlated with the  
273 average shoaling distance between fish (all  $|r| < 0.2$ ) (electronic supplementary material, figure  
274 S1A), indicating that a PCA should include the 6 movement/position variables, but that  
275 shoaling distance should be analyzed separately. We used the first PC from this analysis as our  
276 measure of the movement and position of fish (see Results), and we used the log-transformed  
277 average shoaling distance as a measure of a group cohesion, since it arises from the relative  
278 positions of all three members of the group.

279 To determine if these two measures of naïve-group behavior were affected by the social  
280 environment experienced by a single member of the group, we used them as dependent  
281 variables in general linear mixed models that accounted for repeated measures on a group,  
282 implemented in SAS *Proc Glimmix*. Initial models included fixed effects of the long-term social  
283 environment of the focal fish, time in the long-term social environment, size of the focal female,  
284 the mean size of the novel partner females, mean size of the long-term social partners, and  
285 baseline behavior (i.e., before exposure of the focal female to long-term social environments). To  
286 assess whether the effect of the long-term social environment was mediated by aggression  
287 experienced by the focal female, initial models also included a measure of aggression averaged  
288 over the 4 weeks prior to the naïve-group test (PC1 of aggressive behaviors averaged over those  
289 4 weeks). A within-subjects random effect with focal female ID as the subject was used to  
290 account for the three different naïve-group trials in which each focal female was used; initial  
291 models also included a random effect due to experimental block. Neither the size-related fixed  
292 effects nor the summary measure of aggression ever approached significance in the initial  
293 models (electronic supplemental material, table S3B and C), so only treatment and exposure  
294 time (and their interaction) were retained in the final models. The block random effect was  
295 always near zero and never approached significance, so it was dropped from the final models.

296 We used the compound symmetry covariance structure because it fit the data better than  
297 alternative structures (by AICC and BIC metrics). Post hoc comparisons of group means were  
298 conducted as described above.

299 *Behavior of individuals in naïve-groups.* The main purpose of this analysis was to determine  
300 if differences in the average behavior among groups was attributable to all members of a group  
301 behaving similarly or to specific individuals within the group. For example, if the behavior of  
302 the three females within a group was very similar, then average differences among groups  
303 reflect the behavior of all group members. Alternately, if individuals within groups behaved  
304 differently from one another, then between-group differences could have been driven by the  
305 divergent behavior of a single group member. The former, but not the latter would support  
306 cascading IGE because it would indicate that non-focal behavior was influenced by the prior  
307 social experience of the focal fish. Our primary measure of similarity of the behavior of  
308 individuals within naïve-groups was the intraclass correlation coefficient (ICC). ICC values near  
309 1 indicate that individuals within a group behaved very similarly to one another, whereas lower  
310 values of ICC indicate substantial differences in behavior among members of the group.

311 We first investigated the correlation structure of the same 8 behaviors described above  
312 but measured on individuals rather than the mean of the 3 fish in a group. Similar to the group-  
313 average data, the position/movement variables were moderately to highly correlated with each  
314 other, but not with shoaling distance (electronic supplementary material, figure S1B). We,  
315 therefore, summarized the movement/position behavior of individual fish using the first PC of  
316 the 6 movement/position metrics (table 1). As in the group-averaged data, behaviors associated  
317 with exploration loaded positively on PC1 (distance, velocity, and duration and frequency in  
318 the white zone), while behaviors associated with reluctance to explore loaded negatively on  
319 PC1 (freezing, latency to enter white zone, table 1). Again, we considered positive values of the  
320 first PC to indicate a tendency to be exploratory and negative values a tendency to be stressed.  
321 We used the log-transformed individual shoaling distance (the mean distance of a single  
322 individual from her group mates during a trial) as a measure of individual tendency to shoal.

323 We then calculated the ICC of the individual exploratory behavior scores and the individual  
324 shoaling distances as the ratio of the between-group variance to the total variance. These  
325 variance components were calculated using SAS *Proc Mixed* with default settings and a single  
326 random effect corresponding to the group ID.

327

### 328 **3. Results**

329 *(a) High correlations found within the aggression behaviors and among the movement/position variables*

330 We found that the two measures of aggression (number of acts and time spent) were  
331 highly correlated ( $R^2=0.803$ ,  $p<0.0001$ ), with the first PC explaining 96.9% of the total variation  
332 (electronic supplementary material, figure S2A). For the average behaviors of the naïve-groups,  
333 the first PC summarizing the 6 movement/position variables explained 72.4% of the total  
334 variation, and it was the only PC with an eigenvalue  $>1$  (table 1, electronic supplementary  
335 material, figure S2B). In this PCA, behaviors associated with exploration loaded positively on  
336 PC1 (distance, velocity, and duration in the white zone, and frequency entering white zones),  
337 while behaviors associated with stress loaded negatively on PC1 (freezing, latency to enter  
338 white zone, table 1). We therefore considered positive values of PC1 to indicate a tendency to  
339 explore, and negative values to indicate lack of exploration or stress-like behaviors.

340

341 *(b) Long-term social environments differ in social behavior*

342 Long-term social groups in which the focal fish was housed with two females of its own  
343 clonal lineage exhibited more aggression than groups where the social partners were Clone 1 or  
344 Clone 2 fish (figure 2A, table 2A, effect estimates provided in electronic supplementary  
345 material, table S4). On average, fish in the Monoclonal environment performed 60% more  
346 aggressive acts than fish in the Clone 1 environment ( $14.45 \pm 1.49$  vs.  $9.04 \pm 1.27$  acts per 10-  
347 minute observation bout, respectively; fish in the Clone 2 environment performed  $11.04 \pm 1.18$   
348 aggressive acts per bout, on average). Post hoc tests indicated that the Monoclonal social  
349 environment elicited significantly more aggressive behavior than the Clone 1 environment

350 ( $p < 0.001$ ), but no other contrasts were significant after adjustment for multiple tests  
351 (Monoclonal vs Clone 2:  $p = 0.087$ ; Clonal 1 vs Clone 2:  $p = 0.114$ ; table 2A; electronic  
352 supplementary material, figure S3).

353

354 *(c) Genetic differences in prior social experience for one group member affected behavior of all members of*  
355 *the naïve-groups.*

356         The long-term social environment experienced by the single focal fish in a naïve-group  
357 affected the exploratory behavior of the entire group (table 2B, figure 2B, and electronic  
358 supplementary material, figure S4, effect estimates for fixed effects provided in electronic  
359 supplementary material, table S5). Indeed, the social environment explained 43.1% of the total  
360 variation in the exploratory / stress PC1 scores [50]. This result is particularly striking because all  
361 focal and stimulus fish were members of a single clonal lineage and, therefore, genetically  
362 identical [39]. Specifically, groups in which the focal individual experienced the Monoclonal  
363 long-term social environment exhibited more stress-related behavior (negative values on  
364 exploratory PC1) than groups in which the focal individual experienced Clone 1 or Clone 2  
365 social environments (post-hoc tests: Monoclonal vs Clone 1,  $p = 0.021$ ; Monoclonal vs Clone 2,  
366  $p = 0.004$ ). Naïve-groups in which the focal fish had experienced social environments containing  
367 Clone 1 and Clone 2 did not differ from each other after correction for multiple tests ( $p = 0.259$ ).

368         The mean shoaling distance in the naïve-groups was unaffected by the social  
369 environment experienced by the focal fish, duration of exposure, or their interaction (table 2C,  
370 effect estimates for fixed effects provided in electronic supplementary material, table S5, figure  
371 S5).

372

373 *(d) Individuals within naïve-groups behave very similarly.*

374         Focal and stimulus fish within the naïve-groups were unfamiliar with one another and  
375 had different social experiences prior to the trials. Focal fish were drawn from the long-term  
376 social environments, whereas stimulus fish were all genetically identical, all of similar age and

377 size, and all had similar prior social experience that differed substantially from that of the focal  
378 fish. Moreover, there was substantial variation in behavior across different trials, as indicated  
379 by the significant effects of long-term social environment described above. Nevertheless, the  
380 three individuals in a given trial behaved in a remarkably similar manner (ICC for individual  
381 exploratory behavior: 0.913; ICC for individual shoaling distance: 0.953). Figure 3 shows  
382 representative tracking data for 3 different trios from the naïve-group tests (see electronic  
383 supplementary material, figure S6 for 12 additional representations). The striking visual  
384 similarity of tracking patterns within a given trial is reflected in very high ICC estimates across  
385 each treatment for both individual exploratory behavior (Monoclonal: 0.917; Clone 1: 0.924;  
386 Clone 2: 0.897) and for individual shoaling distance (Monoclonal: 0.941; Clone 1: 0.970; Clone 2:  
387 0.930); variance components and significance tests are reported in electronic supplementary  
388 material, table S7. That is, less than 10% of the total variation in behavior occurred among the  
389 three females within a given trial, despite the substantial differences in behavior among trials  
390 that is evident in figure 3 and electronic supplementary material, figure S6. These high ICC  
391 values indicate that all three individuals within a given trial exhibited highly similar behavior,  
392 despite their different prior experience.

393

## 394 **Discussion**

395 Elucidating the heritable causes of individual and group-level behavior is necessary to  
396 understand the evolution of social traits. Here, we demonstrate that phenotypic effects of  
397 genetically different social environments (IGE) carry over to a novel social environment to  
398 influence the behavior of individuals that did not experience IGE. This cascading effect is  
399 distinct from 'second-order' IGE [20, 21], in which the presence of genetically different  
400 individuals influences interactions between other group members. Our results, therefore,  
401 expand the scope of IGE by demonstrating that they can influence phenotypes even when there  
402 is no genetically-based variation present within groups. Given the prevalence of dispersal and  
403 fission-fusion social structure, there is substantial opportunity for cascading IGE in nature.



404 Recognizing cascading IGE in natural populations and quantifying their influence on  
405 phenotypes and evolvability will be challenging, however. Field research coupled with genetic  
406 analysis, or transplant experiments, could reveal effects that related individuals have on new  
407 social partners, but this would require tracking individuals that disperse into new social  
408 groups. Such investigations can be facilitated by using species with clonal reproduction (e.g.,  
409 many microbes and plants, and some vertebrates and invertebrates). In these systems, high  
410 relatedness within clones will make cascading IGE easier to detect. Sexual species in which  
411 relatedness is known and social interactions can be recorded after dispersal from natal groups  
412 could provide additional opportunities to measure cascading IGE.

413 The cascading IGE we observed was associated with different levels of aggression that  
414 focal fish experienced in the long-term social environments. Somewhat surprisingly, it was the  
415 social environment containing fish of the same clone as the focal animals that exhibited the most  
416 aggression (and the naïve-groups containing these focal fish exhibited the most stress  
417 behaviors). Previous studies found that Amazon mollies exhibited less aggression towards  
418 sister clones when compared to non-sister clones [39, 51]. However, a different focal clonal  
419 lineage was used in those studies, suggesting that responses to sister and non-sister clones (and,  
420 therefore, first-order and cascading IGE) vary across genotypes. Consequently, we predict that  
421 higher levels of aggression within the social environment result in more stressed individuals,  
422 regardless of whether that social environment is monoclonal or composed of non-sister clones;  
423 thus, fish should exhibit less exploratory behaviors when in new social group. Furthermore, this  
424 kind of interaction between the direct effect of an individual's genotype and IGE can produce  
425 frequency-dependent and other forms of balancing selection that can maintain, or rapidly erode  
426 genetic variation [52, 53]. The possibility that similar effects could arise from the interaction of  
427 direct genetic variance and cascading IGE warrants future empirical and theoretical  
428 investigation.

429 In this experiment, it is possible that the cascade of IGE that we observed occurred  
430 because focal females in Clone 1 and Clone 2 treatments experienced a genetic change in the

431 social environment when they moved into the naïve-groups, but focal fish from the Monoclonal  
432 treatment did not. This would predict a significant difference between the Monoclonal  
433 treatment and both Clone 1 and Clone 2 (which we do find), but not between Clone 1 and Clone  
434 2 (for which we found only a non-significant trend). Nevertheless, our data support the  
435 conclusion that genetically identical fish (the naïve partners) behave differently depending on  
436 genetic variation in the prior social environment experienced by another member of the group  
437 (the focal female). Whether cascading IGE depend on the degree of genetic similarity between  
438 past and current social partners should be a focus of future research.

439         We detected no effects of exposure time within the long-term social environments on  
440 aggression in those environments or on cascading IGE in the naïve-groups. Time-course effects  
441 on first-order IGE have been found in mosquitofish [53, 54], and increased exposure time led to  
442 higher aggression in previous studies of Amazon mollies [44, 45]. However, the time course  
443 effects of IGE reported in mosquitofish occurred during maturation, whereas the fish in our  
444 experiment were fully mature at the start of the study. The two studies that reported exposure-  
445 time effects on aggression in Amazon mollies maintained the animals at considerably higher  
446 density than that used in our experiment (44: 1.9 L / fish; 45: 4 L / fish; the present study: 6.3 L  
447 / fish), suggesting that exposure-time effects could be density-dependent.

448         The relatively low density in our long-term social environments might also account for  
449 lack of treatment or cascading effects on shoaling distance, despite strong effects on exploratory  
450 behavior. Anderson et al. [21] found that second-order IGE influenced social cohesion in *D.*  
451 *melanogaster*, and the extensive literature on leadership in social organisms indicates that  
452 differences among individual group members can substantially influence group-emergent  
453 behaviors such as shoaling [55, reviewed in 1]. We, therefore, predict that cascading IGE could  
454 be an important source of individual variation that generates group-emergent phenotypes [26,  
455 56]. In our experiment, groups consisted of only 3 individuals, which might limit the tendency  
456 of these fish to shoal. Experiments that use larger groups and enclosures that allow more

457 flexibility in fission-fusion dynamics could determine the extent to which cascading IGE  
458 influence group-emergent phenotypes.

459 In summary, IGE propagate beyond individuals that directly experience them in  
460 Amazon mollies and possibly in many group-living species. These cascading IGE are a  
461 potentially important cause of individual differences that can lead to the emergence of leaders  
462 and followers, shoaling, swarming, and other group-emergent phenotypes. Theoretical and  
463 empirical expansion of the robust quantitative genetic framework developed for IGE to include  
464 cascading or other types of carry-over effects will facilitate understanding of social behavior  
465 and its evolution.

466

## 467 **References**

- 468 1. del Mar Delgado M, Miranda M, Alvarez SJ, Gurarie E, Fagan WF, Penteriani V, di Virgilio  
469 A, Morales JM. 2018 The importance of individual variation in the dynamics of animal  
470 collective movements. *Philos. Trans. R. Soc. Lond. B. Biol. Sci.* **373**, 2017008.
- 471 2. Jolles JW, King AJ, Killen SS. 2020 The Role of Individual Heterogeneity in Collective  
472 Animal Behaviour. *Trends Ecol. Evol.* **35**, 278-291.
- 473 3. Moore AJ, Brodie III ED, Wolf JB. 1997 Interacting phenotypes and the evolutionary process:  
474 I. Direct and indirect genetic effects of social interactions. *Evolution* **51**, 1352-1362.
- 475 4. Wolf JB, Brodie III ED, Cheverund JM, Moore AJ, Wade MJ. 1998 Evolutionary  
476 consequences of indirect genetic effects. *Trends Ecol. Evol.* **13**, 64-69.
- 477 5. Bijma P, Wade MJ. 2008 The joint effects of kin, multilevel selection and indirect genetic  
478 effects on response to genetic selection. *J. Evol. Biol.* **21**, 1175-1188.
- 479 6. Mutic JJ, Wolf JB. 2007 Indirect genetic effects from ecological interactions in *Arabidopsis*  
480 *thaliana*. *Mol. Ecol.* **16**, 2371-2381.
- 481 7. Hunt J, Simmons LW. 2002 The genetics of maternal care: Direct and indirect genetic effects  
482 on phenotype in the dung beetle *Onthophagus taurus*. *Proc. Natl. Acad. Sci. USA* **99**, 6828-  
483 6832.
- 484 8. Wilson AJ, Gelin U, Perron M-C, Réale D. 2009 Indirect genetic effects and the evolution of  
485 aggression in a vertebrate system. *Proc. R. Soc. B.* **276**, 533-541.
- 486 9. Bleaker BH, Brodie III ED. 2008 Indirect genetic effects influence antipredator behavior in  
487 guppies: Estimates of the coefficient of interaction *Psi* and the inheritance of reciprocity.  
488 *Evolution* **63**, 1796-1806.
- 489 10. McFarlane SE, Gorrell JC, Coltman DW, Humphries MM, Boutin S, McAdam AG. 2015 The  
490 nature of nurture in a wild mammal's fitness. *Proc. R. Soc. B.* **282**, 20142422.
- 491 11. Santostefano F, Wilson AJ, Niemela PT, Dingemans NJ. 2017 Indirect genetic effects: A key  
492 component of the genetic architecture of behaviour. *Sci. Rep.* **7**, 10235.
- 493 12. Alemu SW, Bijma P, Møller SH, Janss L, Berg P. 2014 Indirect genetic effects contribute  
494 substantially to heritable variation in aggression-related traits in group-housed mink  
495 (*Neovison vison*). *Genet. Sel. Evol.* **46**, 30.
- 496 13. Camerlink I, Turner SP, Bijma P, Bolhuis JE. 2013 Indirect genetic effects and housing  
497 conditions in relation to aggressive behaviour in pigs. *PLoS ONE* **8**, e65136.

- 498 14. Baud A, Casale FP, Nicod J, Stegle O. 2020 Dissecting the mechanisms underlying indirect  
499 genetic effects on biomedical phenotypes: a study on 170 behavioural, physiological and  
500 morphological phenotypes measured in adult laboratory mice. *bioRxiv* 302349.  
501 <https://doi.org/10.1101/302349>.
- 502 15. Fisher DN, Wilson AJ, Boutin S, Dantzer B, Lane JE, Coltman DW, Gorrell JC, McAdam AG.  
503 2019 Social effects of territorial neighbours on the timing of spring breeding in North  
504 American red squirrels. *J. Evol. Biol.* **32**, 559-571.
- 505 16. Peeters K, Eppink TT, Ellen ED, Visscher J, Bijma P. 2012 Indirect genetic effects for survival  
506 in domestic chickens (*Gallus gallus*) are magnified in crossbred genotypes and show a  
507 parent-of-origin effect. *Genetics* **192**, 705-713.
- 508 17. Wolf JB, Moore AJ. 2010 Interacting phenotypes and indirect genetic effects: a genetic  
509 perspective on the evolution of social behavior. In *Evolutionary Behavioral Ecology*, pp. 225-  
510 245. New York: Oxford University Press.
- 511 18. Bailey NW, Marie-Orleach L, Moore AJ, Simmons L. 2018 Indirect genetic effects in  
512 behavioral ecology: does behavior play a special role in evolution? *Behav. Ecol.* **29**, 1-11.
- 513 19. Bailey NW, Kolliker M. 2019 Social runaway: Fisherian elaboration (or reduction) of socially  
514 selected traits via indirect genetic effects. *Evolution* **73**, 1549-1563.
- 515 20. Saltz JB. 2013 Genetic composition of social groups influences male aggressive behaviour  
516 and fitness in natural genotypes of *Drosophila melanogaster*. *Proc. R. Soc. B.* **280**, 20131926.
- 517 21. Anderson BB, Scott A, Dukas R. 2017 Indirect genetic effects on the sociability of several  
518 group members. *An. Behav.* **123**, 101-106.
- 519 22. Jolles JW, Boogert NJ, Sridhar VH, Couzin ID, Manica A. 2017 Consistent individual  
520 differences drive collective behavior and group functioning of schooling fish. *Curr. Biol.* **27**,  
521 2862-2868.
- 522 23. Ancillotto L, Allegrini C, Serangeli MT, Jones G, Russo D. 2014 Sociality across species:  
523 spatial proximity of newborn bats promotes heterospecific social bonding. *Behav. Ecol.* **26**,  
524 293-299.
- 525 24. Ruploh T, Henning M, Bischof HJ, von Engelhardt N. 2015 Effects of social conditions  
526 during adolescence on courtship and aggressive behavior are not abolished by adult social  
527 experience. *Dev. Psychobiol.* **57**, 73-82.
- 528 25. Cox JA, Cusick JA, DuVal EH. 2019 Manipulated sex ratios alter group structure and  
529 cooperation in the brown-headed nuthatch. *Behav. Ecol.* **30**, 883-893.
- 530 26. Jolles JW, Weimar N, Landgraf T, Romanczuk P, Krause J, Bierbach D. 2020. Group-level  
531 patterns emerge from individual speed as revealed by an extremely social robotic fish. *Bio.*  
532 *Let.* 20200436.
- 533 27. Jolles JW, Fleetwood-Wilson A, Nakayama S, Stumpe M, Johnstone RA, Manica A. 2014 The  
534 role of previous social experience on risk-taking and leadership in three-spine sticklebacks.  
535 *Behav. Ecol.* **25**, 1395-1401.
- 536 28. Jolles JW, Taylor BA, Manica A. 2016 Recent social conditions affect boldness repeatability  
537 in individual sticklebacks. *An. Behav.* **112**, 139-145.
- 538 29. Hubbs CL, Hubbs LC. 1932 Apparent parthenogenesis in nature in a form of fish of hybrid  
539 origin. *Science* **76**, 628e630.
- 540 30. Avise JC, Trexler JC, Travis J, Nelson WS. 1991 *Poecilia mexicana* is the recent female parent  
541 of the unisexual fish *P. formosa*. *Evolution* **45**, 1530-1533.
- 542 31. Stöck M, Lampert KP, Möller D, Schlupp I, Scharl M. 2010 Monophyletic origin of clonal  
543 lineages in an asexual fish (*Poecilia formosa*). *Mol. Ecol.* **19**, 5204-5215.
- 544 32. Scharl M, Nanda I, Schlupp I, Wilde B, Eppens JT, Schmid M, Parzefall J. 1995  
545 Incorporation of subgenomic amounts of DNA as compensation for mutational load in a  
546 gynogenetic fish. *Nature* **373**, 68-71.
- 547 33. Schlupp I, Riesch R. 2011 Evolution of unisexual reproduction. In *Ecology and Evolution of*  
548 *Poeciliid Fishes* (eds J Evans, A Pilastro, I Schlupp), pp. 50-58. Chicago, IL: University of  
549 Chicago Press.



- 550 34. Lu Y, Bierbach D, Ormanns J, Warren WC, Walter RB, Schartl M. 2021 Fixation of allelic  
551 gene expression landscapes and expression bias pattern shape the transcriptome of the  
552 clonal Amazon molly. *Genome Res.* **31**, 1-8.
- 553 35. Balsano JS, Randle EJ, Rasch EM, Monaco PJ. 1985 Reproductive behavior and the  
554 maintenance of all-female *Poecilia*. *Environ. Biol. Fishes* **12**, 251-263.
- 555 36. Schlupp I, Marler C, Ryan MJ. 1994 Benefit to male sailfin mollies of mating with  
556 heterospecific females. *Science* **263**, 373-374.
- 557 37. Heubel KU, Hornhardt K, Ollmann T, Parzefall J, Ryan MJ, Schlupp I. 2008 Geographic  
558 variation in female mate-copying in the species complex of a unisexual fish, *Poecilia formosa*.  
559 *Behaviour* **145**, 1041-1064.
- 560 38. Makowicz AM, Murray L, Schlupp I. 2020. Size, species, and audience type influences  
561 heterospecific female-female competition. *An. Behav.* **159**, 47-58.
- 562 39. Makowicz AM, Tiedemann R, Steele RN, Schlupp I. 2016 Kin recognition in a clonal fish,  
563 *Poecilia formosa*. *PLoS ONE* **11**, e0158442.
- 564 40. Kallamn KD. 1962 Population genetics of the gynogenetic teleost, *Mollinnesia formosa*  
565 (Girard). *Evolution* **16**, 497-504.
- 566 41. Darnell RM, Lamb E, Abramoff P. 1965 Matroclinous inheritance and clonal structure of a  
567 Mexican population of the gynogenetic fish, *Poecilia formosa*. *Evolution* **21**, 168-173.
- 568 42. Lamatsch DK, Nanda I, Schlupp I, Epplen JT, Schmid M, Schartl M. 2004 Distribution and  
569 stability of supernumerary microchromosomes in natural populations of the Amazon molly,  
570 *Poecilia formosa*. *Cytogenet. Genome Res.* **106**, 189-194.
- 571 43. Laskowski KL, Wolf M, Bierbach D. 2016 The making of winners (and losers): How early  
572 dominance interactions determine adult social structure in a clonal fish. *Proc. R. Soc. B.* **283**,  
573 20160183.
- 574 44. Makowicz AM, Schlupp I. 2015 Effects of female-female aggression in a sexual/unisexual  
575 species complex. *Ethology* **121**, 904-914.
- 576 45. Doran C, Bierbach D, Laskowski K. 2019 Familiarity increases aggressiveness among clonal  
577 fish. *An. Behav.* **148**, 153-159.
- 578 46. Warren WC, García-Pérez R, Xu S, Lampert KP, Chalopin D, Stöck M, Loewe L, Lu Y,  
579 Kuderna L, Minx P, et al. 2018 Clonal polymorphism and high heterozygosity in the celibate  
580 genome of the Amazon molly. *Nat. Ecol. Evol.* **2**, 669-679.
- 581 47. Cachat JM, Canavella PR, Elkhayat SI, Bartels BK, Hart PC, Elegante MF, Beeson EC,  
582 Laffoon AL, Haymore WAM, Tien DH, et al. 2011 Video-aided analysis of zebrafish  
583 locomotion and anxiety-related behavioral responses. In *Zebrafish neurobehavioral protocols*  
584 (eds AV Kalueff, JM Cachat), pp. 1-14. New York, USA: Humana Press.
- 585 48. Baker MR, Goodman AC, Santo JB, Wong RY. 2018 Repeatability and reliability of  
586 exploratory behavior in proactive and reactive zebrafish, *Danio rerio*. *Sci. Rep.* **8**, 12114.
- 587 49. Edwards D, Berry JT. 1987 The efficiency of simulation-based multiple comparisons.  
588 *Biometrics* **43**, 913-928.
- 589 50. Jaeger BC, Edwards LJ, Das K, Sen PK. 2016 An R2 statistic for fixed effects in the  
590 generalized linear mixed model. *J Appl. Stat.* **44**, 1086-1105.
- 591 51. Makowicz AM, Moore T, Schlupp I. 2018 Clonal fish are more aggressive to distant relatives  
592 especially when hungry. *Behaviour* **155**, 351-367.
- 593 52. Wolf JB. 2000 Indirect Genetic Effects and Gene Interactions. In *Epistasis and the Evolutionary*  
594 *Process* (eds JB Wolf, ED Brodie, MJ Wade), pp. 158-176. Oxford: Oxford University Press.
- 595 53. Culumber ZW, Kraft B, Lemakos V, Hoffner E, Travis J, Hughes KA. 2018 GxG epistasis in  
596 growth and condition and the maintenance of genetic polymorphism in *Gambusia holbrooki*.  
597 *Evolution* **72**, 1146-1154.
- 598 54. Kraft B, Lemakos VA, Travis J, Hughes KA. 2018 Pervasive indirect genetic effects on  
599 behavioral development in polymorphic eastern mosquitofish. *Behav. Ecol.* **29**, 289-300.
- 600 55. Bierbach D, Langraf T, Romanczuk P, Lukas J, Nyguyen H, Wolf M, Krause J. 2018. Using a  
601 robotic fish to investigate individual differences in social responsiveness in the guppy. *R.*  
602 *Soc. open sci.* **5**, 181026.

603 56. Herbert-Read JE, Perna A, Mann RP, Schaef TM, Slumpter DJT, Ward AJW. 2011. Inferring  
604 the rules of interaction of shoaling fish. *Proc. Natl. Acad. Sci. USA* **108**, 18726-18731.

605

## 606 **Acknowledgements**

607 We would like to thank Mitch Daniel, Kevin Dixon, and Alexa Guerrera for their input on a  
608 previous version of this manuscript and Ryan Kelly, Hannah Lange, and Jacob Gottlieb for  
609 assistance with the behavioral setup and fish maintenance. This research was approved by the  
610 Florida State University's Institutional Animal Care and Use Committee (#1704 and 201900038).  
611 AMM was supported by Provost Postdoctoral Fellowship Program, DB was funded by the  
612 German Research Foundation (DFG) through Germany's Excellence Strategy (EXC 2002/1  
613 'Science of Intelligence', project number 390523135), and KH was funded by NSF IOS 1354775  
614 and NSF DEB 1740466.

615 **Table 1.** PC loadings for PC1 on group-averaged and individual-level exploratory / stress  
616 behaviors.

617

| <b>Level</b>     | <b>Model</b>             | <b>Measurement</b>            | <b>PC1 loading</b> |
|------------------|--------------------------|-------------------------------|--------------------|
| Group-averaged   | PC1 exploratory / stress | Total distance traveled       | 0.4571             |
|                  |                          | Velocity                      | 0.4565             |
|                  |                          | Frequency entering white zone | 0.4516             |
|                  |                          | Duration in white zone        | 0.3237             |
|                  |                          | Latency to enter white zone   | -0.3053            |
|                  |                          | Time spent frozen in place    | -0.4251            |
| Individual-level | PC1 exploratory / stress | Total distance traveled       | 0.4716             |
|                  |                          | Velocity                      | 0.4711             |
|                  |                          | Frequency entering white zone | 0.4484             |
|                  |                          | Duration in white zone        | 0.3080             |
|                  |                          | Latency to enter white zone   | -0.2605            |
|                  |                          | Time spent frozen in place    | -0.4380            |

618



619 **Table 2:** Test statistic and p-value for statistical model of aggression PC1, exploratory / stress  
 620 behaviors (PC1), and shoaling behaviors as dependent variables.

| Model                                                              | Effect                       | Statistic                              | P-value          |
|--------------------------------------------------------------------|------------------------------|----------------------------------------|------------------|
| <i>A. Aggressive behavior in long-term social treatments (PC1)</i> |                              |                                        |                  |
|                                                                    | Focal female standard length | $F_{1,208.1} = 3.26$                   | 0.072            |
|                                                                    | <b>Social environment</b>    | <b><math>F_{2,250.3} = 7.70</math></b> | <b>&lt;0.001</b> |
|                                                                    | Exposure time                | $F_{7,221.2} = 1.30$                   | 0.253            |
|                                                                    | Social environment*Time      | $F_{14,232.6} = 0.69$                  | 0.788            |
| <i>B. Exploratory/stress behavior in naïve-group trials (PC1)</i>  |                              |                                        |                  |
|                                                                    | <b>Social environment</b>    | <b><math>F_{2,19.91} = 7.55</math></b> | <b>0.004</b>     |
|                                                                    | Exposure time                | $F_{1,23.29} = 0.55$                   | 0.466            |
|                                                                    | Social environment*Time      | $F_{2,16.03} = 0.78$                   | 0.476            |
| <i>C. Shoaling distance in naïve-group trials</i>                  |                              |                                        |                  |
|                                                                    | Social environment           | $F_{2,20.04} = 0.60$                   | 0.560            |
|                                                                    | Exposure time                | $F_{1,26.93} = 0.07$                   | 0.793            |
|                                                                    | Social environment*Time      | $F_{2,20.1} = 3.20$                    | 0.062            |

621

622 **Figure 1:** Schematic of experimental design illustrating the focal females ( $FF_{CL}$ ) tested for pre-  
623 exposure exploratory behaviors with two novel sister clones ( $F_{CL}$ ) at week 0. Focal females were  
624 then transferred into one of the three different social environments: Monoclonal ( $FF_{CL} + 2 F_{CL}$ );  
625 Clone 1 ( $FF_{CL} + 2 CL_1$ ); or Clone 2 ( $FF_{CL} + 2 CL_2$ ). After 4 and 12 weeks of exposure to these  
626 social environments, the exploratory behaviors of the focal females were tested again with novel  
627  $F_{CL}$  individuals. Note that the  $F_{CL}$  partners of the  $FF_{CL}$  were different individuals at each time  
628 period. That is, each individual  $F_{CL}$  was included in only one trial.

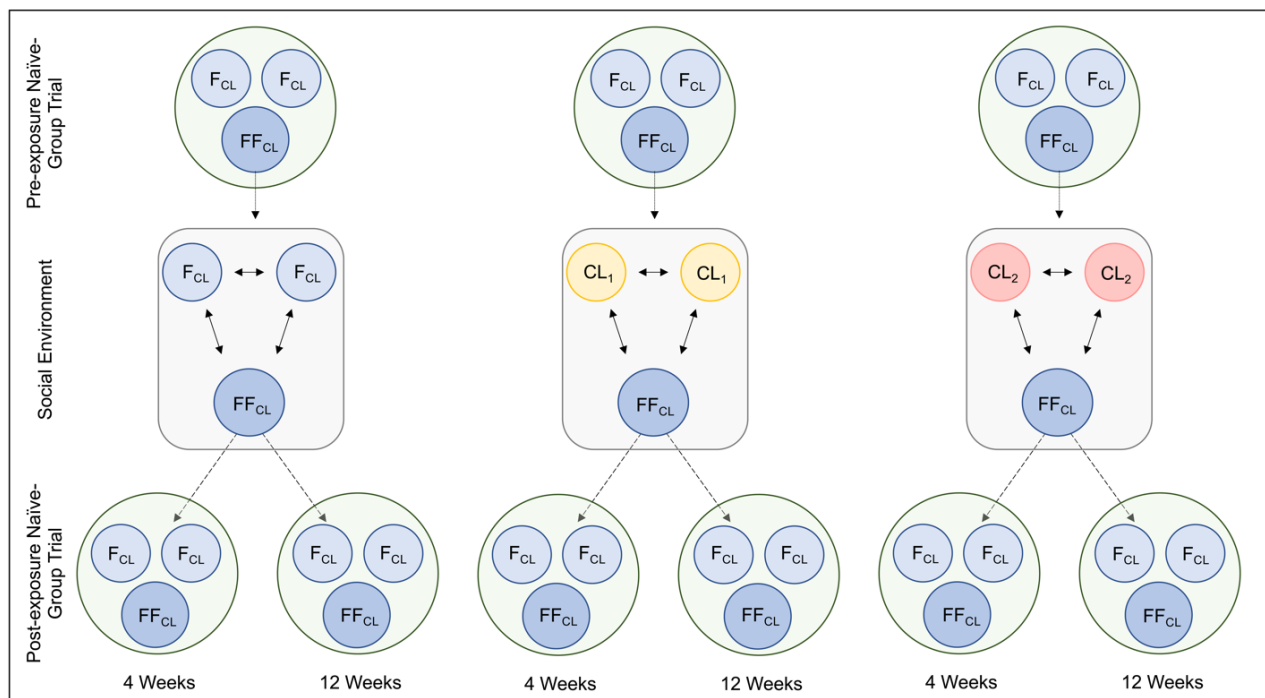

629 **Figure 2:** Least square means  $\pm$  standard error from PC1 for (A.) aggression focal females  
630 were exposed to in each social environment (Monoclonal (blue); Clone 1 (yellow); Clone 2  
631 (pink)). Positive values indicate more aggression. (B.) Exploratory/stress behaviors in the naïve-  
632 group trials. Group-averaged exploratory behaviors with positive values indicating more  
633 exploratory behaviors and negative values indicate less exploratory and more stress behaviors.

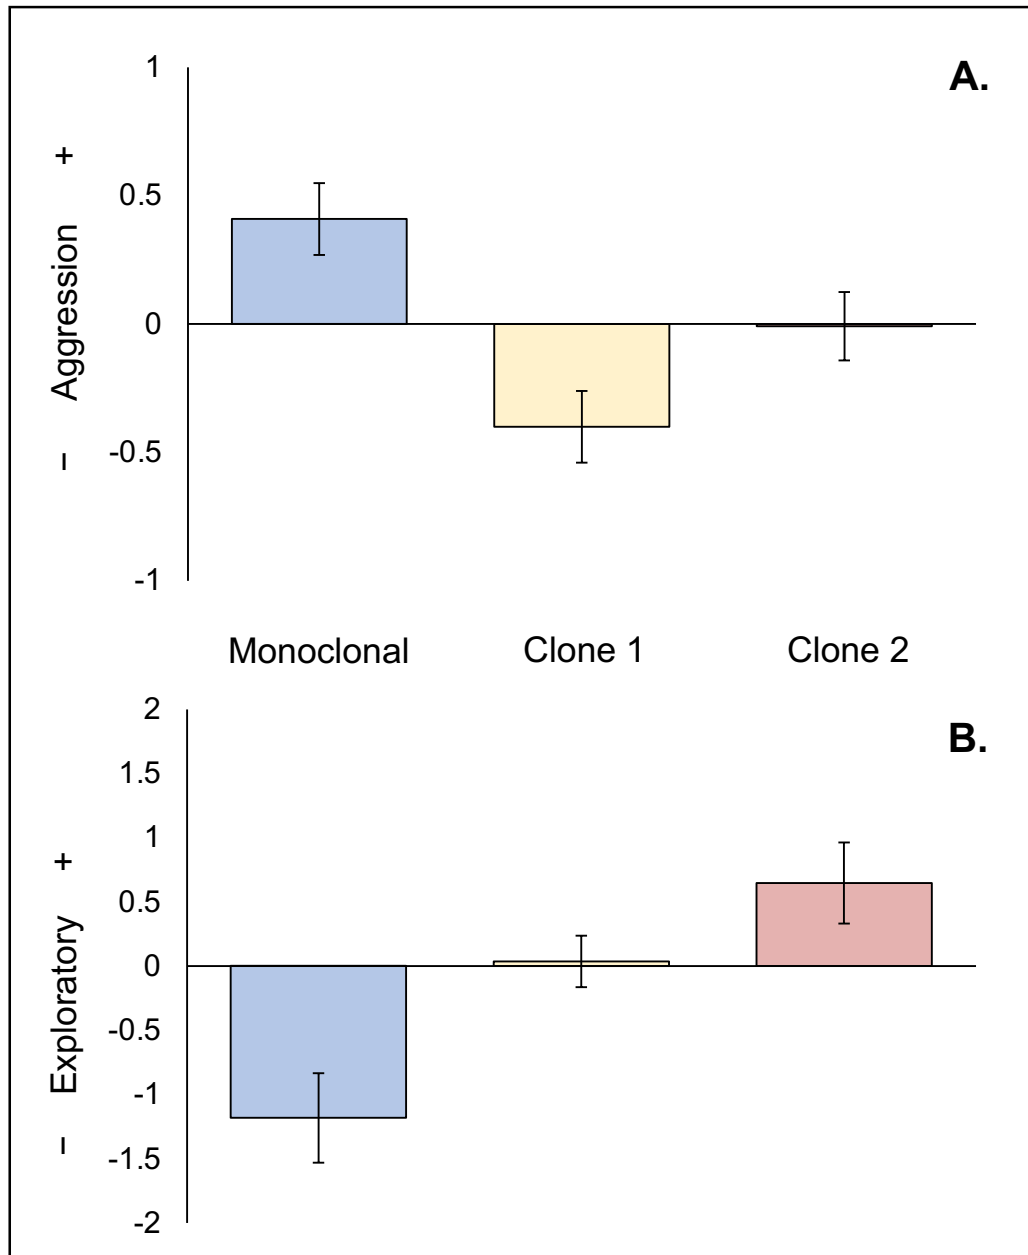

634 **Figure 3:** Visual representation of high intraclass correlation among individuals in the same  
635 naïve-group trial. Within each treatment category (Monoclonal (blue), Clone 1 (yellow), Clone 2  
636 (pink)) each row represents tracks of the three individuals in a single naïve-group trial. At each  
637 time point (Pre-exposure (Pre), 4 wk, and 12 wk) the focal fish and two naïve partners were  
638 tracked. For a given treatment, the same focal female was present at each time point, but her  
639 two social partners were different individuals across time point.

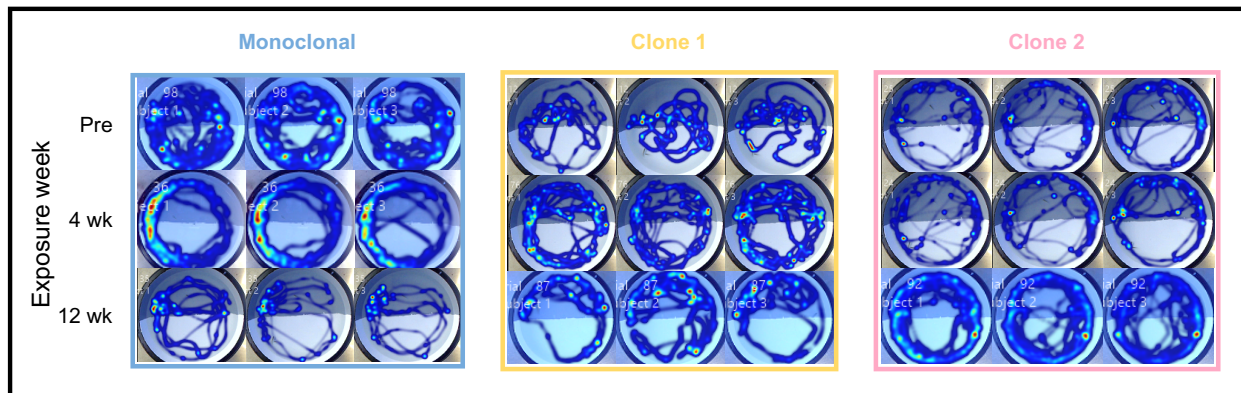

Source: http://biorxiv.org/content/10.1101/2021.02.27.433187v1.full.pdf
